# Supplementary figures and images for: Sports Practice, Body Image Perception, and Factors Involved in Sporting Activity in Italian Schoolchildren
Source: MDPI journal article supplement (doi:10.3390/children10121850), 2023-11-25

Fig. S1: Scatter plots of predicted values against residuals for males (above) and females (below).

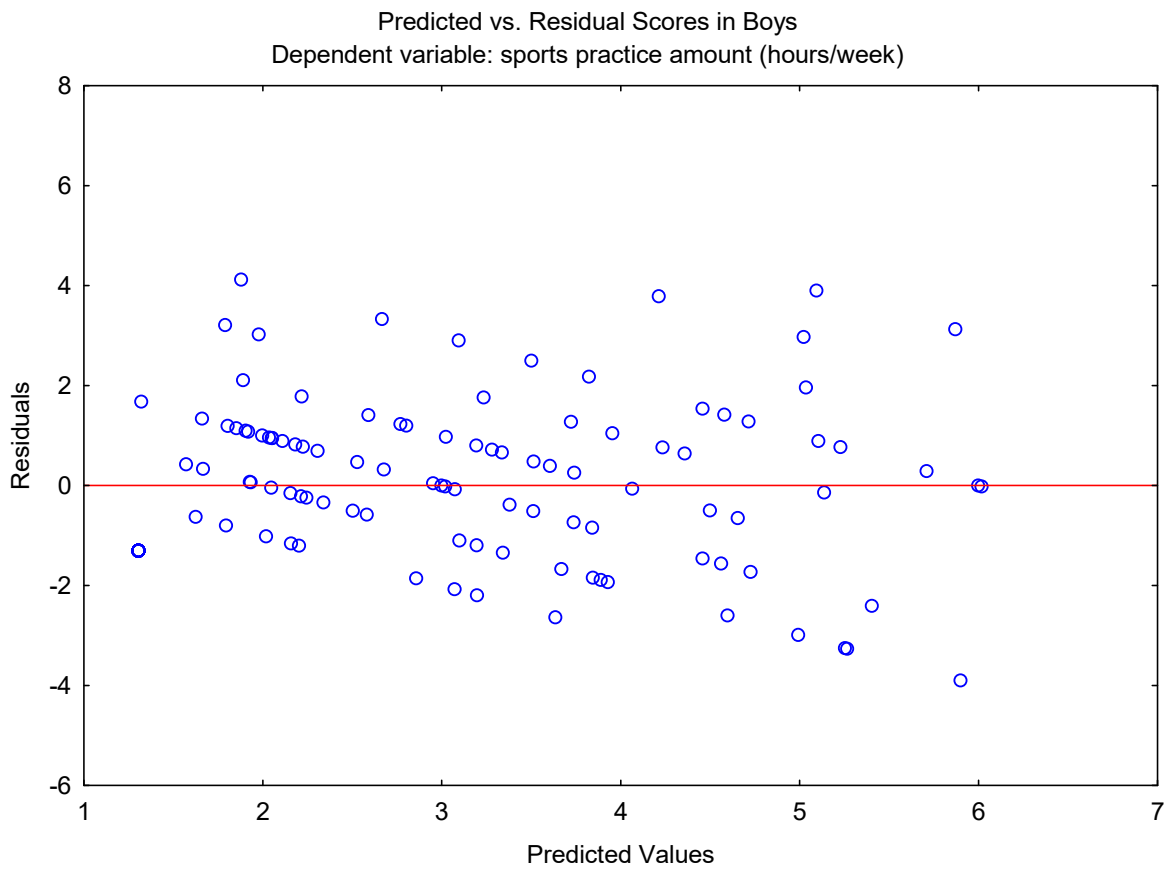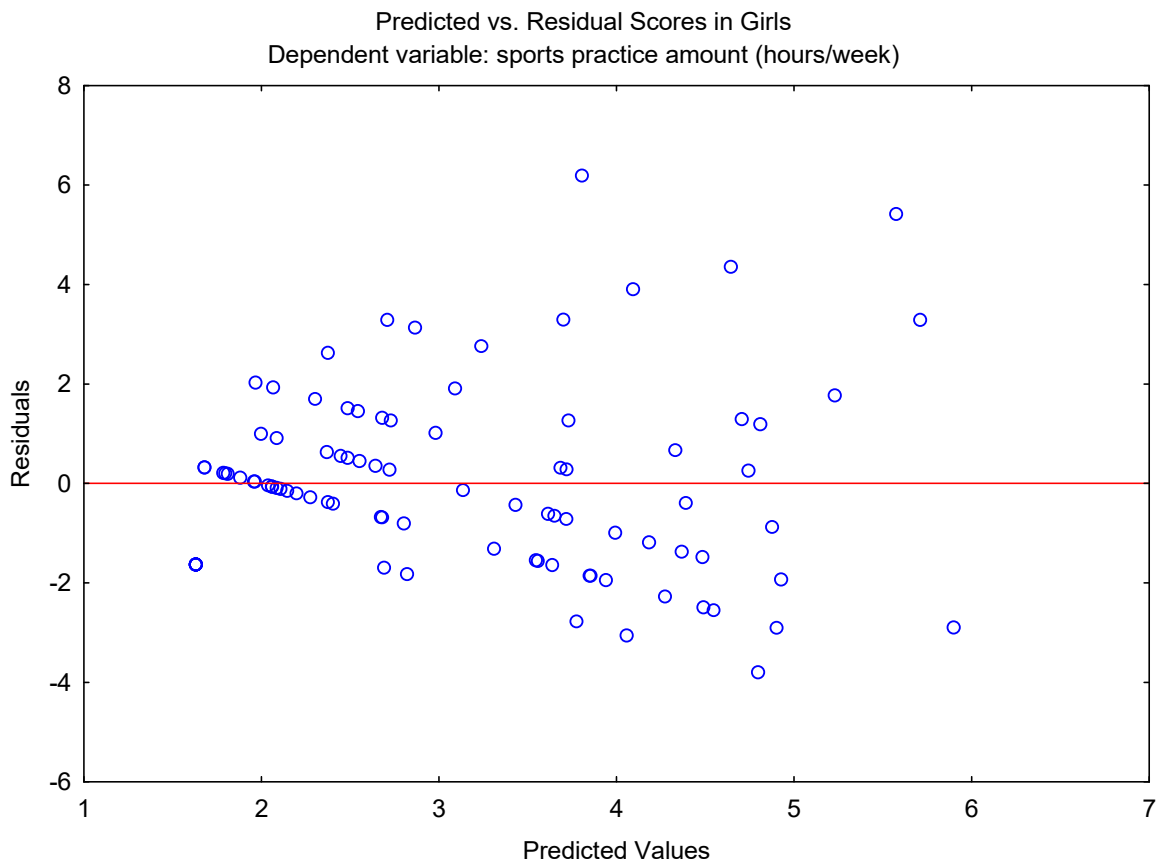

Supplement: s1 [file s1]
